# Supplementary material for: Copper Levels in Patients with Unexplained Dysplastic Cytopenia
Source: PubMed Central journal article supplement (PMC7813699; doi:10.1007/s12011-020-02203-x), 2020-06-02
Supplement: 12011_2020_2203_MOESM1_ESM.pdf [file 12011_2020_2203_MOESM1_ESM.pdf]

Biological Trace Element Research

# Copper Levels in Patients with Unexplained Dysplastic Cytopenia

Dominic Butcher<sup>1</sup>, Simona Deplano<sup>2</sup>, Thomas Lofaro<sup>3</sup>

<sup>1</sup>Imperial College London, Department of Medicine, South Kensington, London, UK

<sup>2</sup>Imperial College NHS Healthcare Trust, Department of Haematology, Hammersmith Hospital, Du Cane Road, London, UK

<sup>3</sup>Imperial College NHS Healthcare Trust, Department of Haematology, Hammersmith Hospital, Du Cane Road, London, UK. ORCID ID: 0000-0003-1248-9192

## Corresponding Author

Dominic Butcher

Email: dominic.butcher15@imperial.ac.uk

ORCID ID: 0000-0002-0812-5639

## Supplementary Materials

### ESM1 Inclusion and exclusion criteria

| <i><b>Inclusion criteria</b></i>                                                                                                                                          | <i><b>Exclusion criteria</b></i>                                                                                     |
|---------------------------------------------------------------------------------------------------------------------------------------------------------------------------|----------------------------------------------------------------------------------------------------------------------|
| Patient had one or more persistent cytopenia(s) or macrocytosis                                                                                                           | Bone marrow blasts found to be increased in excess of >5%                                                            |
| Patient had had a bone marrow examination performed to investigate persistent and unexplained cytopenia(s) or macrocytosis, and a diagnosis of ICUS, IDUS or MDS was made | Patient found to have a clonal cytogenetic or molecular abnormality (with the exception of deletion of chromosome Y) |
| Patient was over 18 years of age.                                                                                                                                         | Patient had been started on treatment for MDS (excluding transfusion, erythropoietin and/or steroid therapy).        |
| Patient had given consent to participate.                                                                                                                                 | Patient unable or unwilling to give consent.                                                                         |
| Patient was under the care of haematology at Hammersmith Hospital.                                                                                                        | Patients who received copper replacement therapy in the past 12 months.                                              |

## ESM2 Participant demographics

| <b>Demographic</b> | <b>Frequency (%)</b> |
|--------------------|----------------------|
| <b>Age</b>         |                      |
| 50 to 59           | 2 (12%)              |
| 60 to 69           | 2 (12%)              |
| 70 to 79           | 6 (35%)              |
| 80 to 89           | 7 (41%)              |
| <b>Sex</b>         |                      |
| Male               | 9 (53%)              |
| Female             | 8 (47%)              |
| <b>Ethnicity</b>   |                      |
| Black Caribbean    | 4 (24%)              |
| Greek              | 1 (6%)               |
| Indian             | 1 (6%)               |
| Middle Eastern     | 2 (12%)              |
| Moroccan           | 1 (6%)               |
| Turkish            | 1 (6%)               |
| White British      | 5 (29%)              |
| White Irish        | 2 (12%)              |
| <b>BMI</b>         |                      |
| <18.5              | 2 (12%)              |
| 18.5 to 24.9       | 6 (35%)              |
| 25.0 to 29.9       | 6 (35%)              |
| >30.0              | 3 (18%)              |

**ESM3 Full blood count results at time of inclusion. All participants had at least one cytopenia M – males; F – females**

| <b>Blood test</b>       | <b>Mean value (median)</b>         | <b>Range</b>                       | <b>(Reference Range)</b>                                                     |
|-------------------------|------------------------------------|------------------------------------|------------------------------------------------------------------------------|
| <b>Red cell count</b>   | M: 4.17 (3.95)<br>F: 3.38 (3.49)   | M: 2.85 to 6.05<br>F: 2.32 to 4.61 | (M: 4.7 to 6.1 x10 <sup>12</sup> /L)<br>(F: 4.2 to 5.4 x10 <sup>12</sup> /L) |
| <b>Haemoglobin</b>      | M: 115 (118.0)<br>F: 104.3 (107.5) | M: 95 to 127<br>F: 74 to 135       | (M: 130 to 180 g/L)<br>(F: 114-165 g/L)                                      |
| <b>Mean Cell Volume</b> | 92.6 (96.4)                        | 58.9 to 109.9                      | (83.5 to 99.5 fL)                                                            |
| <b>Platelets</b>        | 127.2 (113.0)                      | 34 to 387                          | (130 to 370 x10 <sup>9</sup> /L)                                             |
| <b>White Cell Count</b> | 4.6 (4.1)                          | 2.2 to 8.1                         | (4.2 to 10.6 x10 <sup>9</sup> /L)                                            |
| <b>Neutrophils</b>      | 2.2 (2.6)                          | 0.6 to 6.0                         | (2.0 to 7.1 x10 <sup>9</sup> /L)                                             |

**ESM4 Findings for each patient** BMI – Body Mass Index, Cu – serum copper level, Hb – haemoglobin, RCC – red cell count, MCV – mean cell volume, WCC – white cell count, Neut – neutrophils, Plts – platelets, CRP – C-reactive protein, PPI – proton pump inhibitor

| <b>Patient</b> | <b>Gender</b> | <b>Age</b> | <b>BMI</b> | <b>Cu</b> | <b>Hb</b> | <b>RCC</b> | <b>MCV</b> | <b>WCC</b> | <b>Neut</b> | <b>Plts</b> | <b>CRP</b> | <b>Dysplastic lineage(s)</b> | <b>Risk factors</b>      |
|----------------|---------------|------------|------------|-----------|-----------|------------|------------|------------|-------------|-------------|------------|------------------------------|--------------------------|
| <b>1</b>       | Male          | 79         | 21.30      | 11.3      | 113       | 6.05       | 58.9       | 2.9        | 1.5         | 36          | 0.6        | Erythroid & Megakaryoblastic |                          |
| <b>2</b>       | Male          | 78         | 28.10      | 13.3      | 119       | 5.74       | 62.4       | 3.6        | 1.4         | 133         | 1.0        | Erythroid                    |                          |
| <b>3</b>       | Male          | 81         | 31.60      | 14.7      | 127       | 4.47       | 82.7       | 4.1        | 0.7         | 116         | No CRP     | Trilineage                   |                          |
| <b>4</b>       | Female        | 71         | 24.20      | 15.3      | 114       | 3.44       | 104.9      | 4.1        | 2.5         | 68          | 0.3        | Erythroid & Megakaryoblastic | Dialysis, PPI            |
| <b>5</b>       | Male          | 82         | 32.50      | 16.8      | 124       | 4.15       | 101.0      | 4.2        | 2.8         | 126         | 2.5        | Erythroid                    | Dialysis, PPI            |
| <b>6</b>       | Female        | 80         | 21.00      | 17.1      | 95        | 3.04       | 97.0       | 8.1        | 5.0         | 387         | 2.0        | Declined marrow              |                          |
| <b>7</b>       | Male          | 67         | 27.40      | 18.9      | 104       | 3.45       | 92.0       | 4.9        | 2.2         | 194         | No CRP     | Trilineage                   | Low copper diet          |
| <b>8</b>       | Male          | 64         | 34.30      | 19        | 110       | 3.60       | 96.4       | 7.7        | 6.0         | 82          | 9.8        | Erythroid                    | PPI                      |
| <b>9</b>       | Female        | 84         | 17.90      | 19.5      | 111       | 3.65       | 101.4      | 2.3        | 1.6         | 87          | 1.1        | Trilineage                   | PPI                      |
| <b>10</b>      | Female        | 76         | 17.90      | 19.7      | 135       | 4.61       | 89.2       | 6.0        | 3.4         | 111         | 0.4        | Megakaryoblastic             | PPI, low copper diet     |
| <b>11</b>      | Male          | 83         | 21.10      | 19.7      | 118       | 3.25       | 107.7      | 3.2        | 2.2         | 151         | 2.9        | Erythroid                    |                          |
| <b>12</b>      | Female        | 55         | 27.18      | 20.6      | 81        | 2.32       | 109.9      | 4.0        | 2.0         | 34          | 1.4        | Erythroid & Megakaryoblastic |                          |
| <b>13</b>      | Male          | 83         | 27.40      | 20.9      | 125       | 3.95       | 95.9       | 5.7        | 2.8         | 113         | 0.3        | Myeloid                      | PPI, multivitamins       |
| <b>14</b>      | Male          | 84         | 28.30      | 21.8      | 95        | 2.85       | 103.5      | 2.3        | 0.9         | 76          | 32.5       | Myeloid & Megakaryoblastic   | Multivitamin, neuropathy |
| <b>15</b>      | Female        | 75         | 28.60      | 22.0      | 74        | 2.52       | 82.5       | 2.2        | 0.6         | 49          | 58.8       | Trilineage                   | PPI                      |
| <b>16</b>      | Female        | 59         | 20.10      | 22.8      | 104       | 3.88       | 83.0       | 8.0        | 4.6         | 200         | 3.9        | Trilineage                   |                          |
| <b>17</b>      | Female        | 72         | 20.80      | 23.6      | 121       | 3.54       | 105.4      | 5.3        | 3.7         | 199         | 2.4        | Megakaryoblastic             |                          |

**ESM5 Risk factors for copper deficiency in our population**

| <b>Risk factor</b>                                     | <b>Frequency (%)</b> |
|--------------------------------------------------------|----------------------|
| <i>Dialysis</i>                                        | 2 (12%)              |
| <i>Proton pump inhibitor use</i>                       | 7 (41%)              |
| <i>Nutrition &amp; Metabolic</i>                       |                      |
| <i>Low copper intake</i>                               | 2 (12%)              |
| <i>Alcohol excess</i>                                  | 0 (0%)               |
| <i>Zinc-containing supplements</i>                     | 2 (12%)              |
| <i>Enteral nutrition, Total parenteral nutrition</i>   | 0 (0%)               |
| <i>Copper metabolism defects e.g. Menkes, Wilson's</i> | 0 (0%)               |
| <i>Gastrointestinal</i>                                |                      |
| <i>Upper bowel resection, Bariatric surgery</i>        | 0 (0%)               |
| <i>Short bowel syndrome</i>                            | 0 (0%)               |
| <i>Chronic diarrhoea</i>                               | 0 (0%)               |
| <i>Inflammatory bowel disease</i>                      | 0 (0%)               |
| <i>Neurology</i>                                       |                      |
| <i>Optic neuropathy</i>                                | 1 (6%)               |
| <i>Peripheral neuropathy</i>                           | 1 (6%)               |

## ESM6 Health Questionnaire used to gather patient information

# Health Questionnaire

For the participants of the study: Reviewing the prevalence of copper deficiency in patients with suspect myelodysplastic syndromes

Please answer as many questions as you wish. The information you provide will only be available to researchers in this study, who will anonymise this information when it is entered into a password-protected document on an Imperial College Healthcare NHS Trust computer. This form will be disposed of in a confidential waste bin.

**Full name:** \_\_\_\_\_

**Date of birth:** \_\_\_\_\_

**Gender:** \_\_\_\_\_

**Occupation:** \_\_\_\_\_

**Are you exposed to any hazardous chemicals at work? Yes/No.** If yes, please specify:

\_\_\_\_\_

### Ethnic Origin:

This is not about nationality, place of birth or citizenship. It is about the group to which you perceive you belong. Please circle the appropriate answer.

#### Prefer not to say

**White:** English/Welsh/Scottish/Northern Irish/Irish/British/Other, please specify: \_\_\_\_\_

**Mixed/multiple ethnic groups:** White and Black Caribbean/White and Black African/White and Asian/Other mixed background, please specify: \_\_\_\_\_

**Asian:** Indian/Pakistani/Bangladeshi/Chinese/Asian British/Other, please specify: \_\_\_\_\_

**Black:** Black/African/Caribbean/Black British/Other, please specify:

---

**Any other ethnic group, please specify:**

---

**Height:** \_\_\_\_\_ **Weight:** \_\_\_\_\_

**Current medications:**

---

---

---

---

**Are you currently undergoing any form of dialysis? Yes/No.** If yes, please give details and the length of time you have been on dialysis:

---

---

**Are you currently involved in any other research studies? Yes/No.** If yes, please give details of the other study/studies:

---

---

**Diet:**

**Are you vegetarian/vegan (please delete as appropriate)? Yes/No.**

**Do you follow a specific diet plan? Yes/No.** If yes, please give details of your diet:

---

---

---

---

**Do you take any vitamins or supplements e.g. zinc supplements? Yes/No.** If yes, please specify:

---

---

---

**Have you received enteral nutrition (i.e. received food through a tube that is attached directly to your intestinal tract) or intravenous nutrition in the past 3 months? Yes/No.** Please specify why you had this type of nutrition and for how long:

---

---

---

**How much alcohol do you drink in a typical week?**

**None** (please circle if appropriate)

**Beer** \_\_\_\_\_ pints

**Cider** \_\_\_\_\_ pints

**Wine** \_\_\_\_\_ bottles

**Spirits** \_\_\_\_\_ bottles

**For how many years has this level of drinking been typical?**

---

### Medical History:

**Have you ever had gastrointestinal surgery e.g. bowel resection, bariatric surgery? Yes/No.** If yes, please specify:

---

---

**Do you suffer from any of the following?**

**Coeliac Disease. Yes/No.**

**Cystic Fibrosis. Yes/No.**

**Short Bowel Syndrome. Yes/No.**

**Chronic Diarrhoea. Yes/No**



**Any other digestive or malabsorption condition (please specify):**

---

---

**Peripheral neuropathy. Yes/No.**

**Myeloneuropathy. Yes/No.**

**Spasticity. Yes/No.**

**Any other neurological condition (please specify):**

---

---

**Any visual impairment (please specify):**

---

---

**Wilson's Disease. Yes/No.**

**Menkes Disease. Yes/No.**

**Have you ever been diagnosed with any other conditions of copper metabolism? Yes/No. If yes, please specify:**

---

---

*Many thanks for any information you have provided and for your participation in our study.*
